# Supplementary material for: Multi-host disease management: the why and the how to include wildlife
Source: BMC Vet Res. 2019 Aug 14;15:295. doi: 10.1186/s12917-019-2030-6 (PMC6694651; doi:10.1186/s12917-019-2030-6)
Supplement: Supplementary file 2 — The decision-making framework. The decision-making framework is designed for the selection of management actions to achieve the general and unit-specific management goals. This framework is a spreadsheet consisting of five sheets. The first sheet is a general presentation which presents how the framework operates and invites the user to select the appropriate transmission pathways for the chosen diseases. To cover all the transmission scenarios, three sheets are then proposed: the “direct transmission” worksheet presents only management actions relevant for direct transmission; the “indirect transmission” worksheet present management actions for both direct and indirect transmission; and the “vector-borne transmission” worksheet presents management actions for vector-borne, indirect and direct transmission. For each relevant unit (humans, captive animals, environment and wildlife), each listed management action should be weighed against the following factors: feasibility, cost and efficiency for the pre-established management goal (eradication of the disease, control of the disease, prevention of the disease or laissez-faire). Following this process should leave the manager with a list of one or more management actions for each unit, which match the 3 criteria and should be considered for implementation. (XLS 148 kb) [file 12917_2019_2030_MOESM2_ESM.xls]

## Sheet: Method
Decision-making framework at the human/captive animals/environment/wildlife interface:
Which measures in reaction to an outbreak due to
(example)
1. First step : transmission route of the disease ?
The first aim in all outbreak situations is to break the transmission line between the source population (infected animals) and the target (sensitive population).
This is highly dependent on the transmission route.
Detail in the table below the transmission route(s) of the pathogen concerned by the plan:
Transmission route of the disease			Yes/no	Details
Direct transmission			yes	(Describe here the direct contacts which enable the transmission)• Bites • Contact with blood, saliva and other secretions or excretions containing infectious organisms • Venereal • Food-borne or predation/scavenging (ingestion)
Indirect transmission			no	(Describe here the different modalities of indirect transmission) Via fomites • Inhalation • Ingestion • Inoculation • Contact
Vector-borne transmission			no	(Describe here the vector and its main ecological characteristics)• Air-borne vectors (Culicids or mosquitoes, dipteral insects in general) • Terrestrial vectors (Ticks and fleas mainly).
2. Second step: which measure(s) for which unit(s) and for which goal ?
For each type of transmission (direct, indirect and vector-borne), four units can be concerned by possible actions: the human unit (for a zoonotic disease), the captive animals unit (when disease can potentially concern livestock or other domestic animals), the environment unit and the wildlife unit.
Four categories of goals are possible, in general and for each compartment: Prevention includes all measures designed to exclude or prevent the introduction of a disease into an unaffected population, Control applies to activities designed to reduce the frequency of occurrence or the effects of an existing disease within an individual animal or a population to an acceptable or tolerable level, or…
A general management goal has to be chosen for the outbreak, leading to choosing categories of objectives for each relevant unit, according to each unit's epidemiological role
According to the transmission route of the disease, fill in the check-list of measures in the corresponding sheet:
(if the transmission route is multiple, fill in the "vector-born transmission" sheet or, if non vectors, the "indirect transmission" sheet)
Direct transmission			Indirect transmission			Vector-borne transmission
3. Third step: synthesis of the action plan
For a summary of the measures to implement, see the window						synthesis

## Sheet: Direct transmission
Check-list of relevant options for control of a disease with direct transmission
3 aspects have to be considered before conclusion on each measure:
- Feasibility (do tools/methods exist and are available for the implementation of measures?)
- Cost (What is the cost : financial cost, human effort, logistics in general, other costs)
- Efficiency (is this measure alone effective or not sufficient)
Terms in bold and italic characters are explained at the end of the tab
Measures to consider in order of priority for evaluation	Description of the measures	Management goal for each unit: Prevention, Control, Eradication, Laissez-faire	Feasibility	Cost	Efficiency	To be considered according to answers to the 3 precedent cells (YES/NO)	Comments/arguments on the possible measure	Other comments
Human unit
Unit to consider when zoonotic disease, all measures concerning this compartment limit exposure/effects of the disease on humans but have no impact on pathogen circulation
Education	Answer yes if one or more measures below can be implemented					yes
Information, communication	Information of professionals, doctors in particular, communication to the general public and professions at risk, education at different levels
Protective measures for exposed professionnals	Implementation of protective measures (protective garment, masks, and gloves) for exposed professionals (including game wardens, scientists, students and wildlife veterinarians)
Modification of behavior	Modification of behavior including hygiene.
Food hygiene and inspection	Implement game carcass or meat inspection (as imposed by hygiene package) and prefer long cooking, deep freezing for preparation or storage of venison (such hygiene measures have to be proven efficient in pathogen reduction beforehand).
Vaccination	Vaccination programmes should be risk-based and concern exposed groups. When outbreaks are localised, in addition to locals, tourists (including hunters) may need to be immunised					no
Treatment	Implementation of protective measures, including early treatment of exposed groups, clearly does not affect the maintenance of the pathogen of interest. The aim here is to prevent consequences of zoonotic infections. Testing is a relevant option, when possible, and be risk-based. An important aspect is informing medics to ensure precocious and sometimes preventive treatment					no
Captive animals unit
Compartiment to consider when susceptible domestic animals can be affected by the infection of interest, or play a role of liaison host toward human
Zoning and establishment of a containment zone	Zoning aims at defining subpopulations of distinct health status within a territory for the purpose of disease control and/or international trade. Zoning applies to an animal subpopulation defined primarily on a geographical basis (using natural, artificial or legal boundaries). In practice, spatial considerations and good management including biosecurity plans play important roles in the applica…					no
	Establishment of a containment zone: A particular application of the concept of zoning is the establishment of a containment zone. In the event of limited outbreaks of a specified disease within an otherwise free country or zone, a single containment zone, which includes all cases, can be established for the purpose of minimizing the impact on the entire country or zone.
Compartmentalisation	Compartmentalisation aims at defining subpopulations of distinct health status within a territory for the purpose of disease control and/or international trade. Compartmentalisation applies to an animal subpopulation defined primarily by management and husbandry practices related to biosecurity. In practice, spatial considerations and good management including biosecurity plans play important rol…					no
Biosecurity and biocontainment in general: Segregation, housing, fencing	Answer yes if one or more measures below can be implemented					yes
Segregation/Isolation	Reduce contacts with the source by creating a “bubble” around domestic animals. Efficiency of isolation strongly depends on the size and intrusive behaviour of the wild animal releasing the pathogen
Scaring away wildlife	All devices that scare or repel wild animals can be tested, but these devices can also deter domestic animals from using those surfaces dedicated to them. Wild animals may learn quickly to avoid these devices, or get used to them and not be scared away from them
Reduction of attractivity	Reduce contacts by reducing attractivity of land used by domestic animals for source, generally wildlife: no salt stone, perches, feeders, drinkers
Offal and carcass retriveval	Food-borne diseases: hunters and game wardens should ensure appropriate disposal of by-products after hunting (offal and remains) in order to restrict access to domestic or wild animals. Also pigs, poultry or cats may not be fed with these by-products.
Vaccination	When the wild reservoir is large (in size and number), not clinically affected by the pathogen but sheds the pathogen, and desirable (patrimonial interest), development and deployment of a vaccination scheme may be a long term option to allow sustainable breeding of livestock in proximity to wildlife.					no
	The delineation of cattle vaccination area has to be conservative and precautious since the exact delimitation of the range used by infected wild animals may be imprecisely known (considering that would be easier to achieve for directly transmitted infections)
	Questions to consider:
	1. Does a vaccine exist for livestock regarding the disease of interest?
	2. Does this vaccine confer full protection from infection or does it limit the progression of infection or its excretion by vaccinated host?
	3. Is it safe?
	4. Is this vaccine effective enough at individual scale to protect against infection (mass vaccination is there not an aim)?
	5. Fast and efficient administration (e.g. for ring vaccination in emergency situation)
	6. Is there a DIVA (Differentiating Infected from Vaccinated Animals) strategy available?
	7. How long will the domestic population be protected/how often will the vaccination have to be repeated under continuous exposure to wildlife?
Culling	Most efficient for directly transmitted diseases					no
	Culling of domestic animals can only be deemed useful if the identified population is considered a secondary source of infection for humans, other domestic populations or wildlife and that the health status of this population cannot be restored by other means (isolation, treatment, and vaccination).
	When such measure would not be scheduled for the wildlife compartment, communication to farmers and acceptance by them may be an issue. Anyhow, culling exposed herds or flocks may be a way to establish a buffer zone in between the reservoir and a surrounding large stock of cattle. Financial compensation must be considered.
	Test and cull procedures may be an intermediate option.
Laissez-faire	Laissez-faire (Doing nothing) in the domestic animal compartment has been recognized as a valuable option by the group and is always the baseline scenario, in any intervention evaluation process, to compare interventions to in terms of costs and efficiency. Indeed, the costs of action may be, in certain conditions, higher than the impacts of pathogen circulation.					no
	Laissez-faire may be applicable only for some options among the range of possibilities it has described. It means “refrain from harming”, in the same context of the adage “primum non nocere” that the medical professions share to guide a prudent and proportionate response to cure a disease.
	Active monitoring and surveillance, communication to exposed public and early reactions are actually far from doing nothing. This means that this course of action also bears non negligible financial and human costs and has to be implemented over the long term.
Environmental unit
The smaller the area to manage, the greater the chances of efficacy and the smaller the chances to limit detrimental ecological effects. In general modifying components of the natural environment leads to a cascade of events which are particularly difficult to predict and evaluate in advance, these measures are then to be implemented with care and caution.
Environment modification to limit attraction of wildlife	Environment may be managed to attract wild animals far from contact zones (deer or boars inside forests). Separation of wild and domestic animals may be useful. Long fences when appropriately designed may orient movements of wild animals or isolate livestock from infectious contacts. They may also deter wild animals from essential resources and have long term impact on the turnover of their natur…					no
Laissez-faire	Laissez-faire (Doing nothing) in the environmental compartment has been recognized as a valuable option by the group and is always the baseline scenario, in any intervention evaluation process, to compare interventions to in terms of costs and efficiency.					no
	Laissez-faire may be applicable only for some options among the range of possibilities it has described. It means “refrain from harming”, in the same context of the adage “primum non nocere” that the medical professions share to guide a prudent and proportionate response to cure a disease.
	Action on the environment may yield multiple and unforeseable consequences that may be greater than the positive impact on a single pathogen.
Wildlife unit
Indicators of success of measures on wildlife compartment should concern not only the source of the pathogen (wild population), but also the target populations (humans, livestock, other domestic animals) in order to assess the overall efficiency of the campaigns
Biosecurity*	Biosecurity measures aiming at reducing infectious contacts among wildlife are of particular importance in the case of directly transmitted diseases.					yes
	Answer yes if one or more measures below can be implemented
Limit aggregation and contacts	Stopping feeding points for wildlife and banning game management encouraging wildlife to gather.
Offal and carcass retriveval	Ensure that offal and carcass disposal do not expose wildlife to infection (reinforce retrieval of offal and appropriate burning or burying of virulent relieves or remains).
Limit dispersal	Dispersal of infectious individuals can be increased by driven hunt. Therefore, banning sport hunting in infected areas can help limiting the expansion of an outbreak. Other activities in the natural environment may have a dispersing effect and shall be banned as well.
Vaccination	This measure can be selective or not. Vaccination of wildlife is a long term and expensive measure which should be considered as experimental. Vaccine production is then another issue. For herbivorous species, delivery systems are at very early stage of experimentation. Injection of vaccine may be an option when animals targeted can be trapped in number. Remote delivery of vaccine bait in the nat…					yes
	The prerequisites considered previously for immunisation of domestic animals have to be addressed for wildlife
Treatment	Treatment of wildlife is an option by the use of antibiotics or wormicid (anthelmintic) and poses questions regarding resistance due to difficulty to strictly follow a medical prescription and spread of residues. Yet wildlife treatment was limited to captive populations or limited scale trials. Treatment can only be seen as an option when the disease endangers the conservation of a species with a…					no
Culling	Culling, for purposes of controlling a disease, is effective to protect victim species, only when the maintenance population is a wild species. When domestic animals maintain the pathogen, culling of a wild species is counterproductive as it does not affect pathogen circulation. The maintenance host, and specifically the exact epidemiological role of the wild hosts, must be carefully examined in …					no	The potential for a perturbation effect should be evaluated. Whilst this is an area of active research, risk factors associated with the potential for a perturbation effect should be consulted. This should be considered in relation to (logistically realistic) culling efficacy in space and time and can be built in to the performance targets of a culling operation.
	For both total culling and test and cull methods, three epidemiological and biological aspects have an impact on the efficiency:						Monitoring: Culling of free living wildlife, whichever the type of killing, can only be seen as an option in wild populations that are well monitored. In order to achieve and monitor a culling operation, precise knowledge on the pre-cull population size and structure is needed, which in itself can prove to be a major challenge. Monitoring is essential because the efficiency of the method has to b…
	1. Efficiency of such procedures will be lower in bigger and more open populations (numerical objectives harder to achieve, more contact with other populations).
	2. Efficiency of such procedure will be higher for pathogens with long incubation periods and lower excretion levels.						There are welfare, ecological and ethical issues in culling wild animals (also legal issues for protected species). The reluctance of wide parts of human society must be taken into account in assessing the desirability of these operations and this must be weighed against the benefits of such operations, as well as other social and political concerns.
	3. And efficiency depends on the prevalence of the disease. The more prevalent, the more efficient.
Total culling	Depopulation : Preferably for a population of limited size and geographically distributed, the aim is eradication of the pathogen by eradication of the host population. Total culling is therefore not an option in multi-host maintenance systems. Total culling operation can only be seen as a “one shot” operation; to avoid those new receptive individuals relaunched the infection process: the numeric…
Test and Cull	Test and cull requires the existence of appropriate testing methods (simple & rapid, useable in the field, sensitive and eventually specific). Test and cull procedures are expensive because animals need to be captured, handled, tested and then released or euthanized (in remote areas, where scavengers may use the carcasses, proper disposal of carcasses is an issue). Such measures therefore require…
	There is also a risk inherent to this method: such procedure leave entirely susceptible animals on the field (only the positive animals are culled). Such procedures have to be carefully prepared in order to eradicate or cull a sufficient number of positive animals to break the transmission. If an insufficient proportion of positive animals is culled, a new outbreak becomes possible.
Laissez-faire	In the management of wildlife diseases, the demand for action is strong. Pressure on the decision makers by civil stakeholders experiencing a negative economic impact of the disease may be important (farmers, farming value chain actors, etc.). Laissez-faire has been nevertheless unanimously recognized as a valuable option by the group and is always the baseline scenario, in any intervention evalu…					no
	Laissez-faire may be applicable only for some options among the range of possibilities it has described. It means “refrain from harming”, in the same context of the adage “primum non nocere” that the medical professions share to guide a prudent and proportionate response to cure a disease.
	Active monitoring and surveillance, communication to exposed public and early reactions are actually far from doing nothing. This means that this course of action also bears non negligible financial and human costs and has to be implemented over the long term.
* The forthcoming “animal health law” will expand the use of these concepts in animal productions.
i.Zoning
Zoning is a large scale measure that aims at identifying areas of circulation of a pathogen, by preventing and prohibiting the entry of susceptible livestock herds in these areas, avoiding infectious contact so as to define geographic areas free of the disease.
ii Compartmentalisation
Subpopulations of livestock contained in one or more establishments are raised under a common biosecurity management system requiring containment, surveillance and control and for the purpose of a safe trade.
iii Biosecurity in general: Isolation, housing, fencing
The efficiency of such methods also strongly depends on the size and intrusive behaviour of the wild animal releasing the pathogen. As an illustration, a wide-mesh netting can be effective for deer but not for small rodents or birds.
Confinement: There is a welfare issue in housing live animals (previously bred in open range) for long period of time.

## Sheet: Indirect transmission 
Check-list of relevant options for control of a disease with indirect transmission (and eventual direct transmission)
3 aspects have to be considered before conclusion on each measure:
- Feasibility (do tools/methods exist and are available for the implementation of measures?)
- Cost (What is the cost : financial cost, human effort, logistics in general, other costs)
- Efficiency (is this measure alone effective or not sufficient)
Terms in bold and italic characters are explained at the end of the tab
Measures to consider in order of priority for evaluation	Description of the measures	Management goal for each unit: Prevention, Control, Eradication, Laissez-faire	Feasibility	Cost	Efficiency	To be considered according to answers to the 3 precedent cells (YES/NO)	Comments/arguments on the possible measure	Other comments
Human unit
Unit to consider when zoonotic disease, all measures concerning this compartment limit exposure/effects of the disease on humans but have no impact on pathogen circulation
Education	Answer yes if one or more measures below can be implemented					yes
Information, communication	Information of professionals, doctors in particular, communication to the general public and professions at risk, education at different levels
Protective measures for exposed professionnals	Implementation of protective measures (protective garment, masks, and gloves) for exposed professionals (including game wardens, scientists, students and wildlife veterinarians)
Modification of behavior	Modification of behavior including hygiene.
Food hygiene and inspection	Implement game carcass or meat inspection (as imposed by hygiene package) and prefer long cooking, deep freezing for preparation or storage of venison (such hygiene measures have to be proven efficient in pathogen reduction beforehand).
Vaccination	Vaccination programmes should be risk-based and concern exposed groups. When outbreaks are localised, in addition to locals, tourists (including hunters) may need to be immunised					no
Treatment	Implementation of protective measures, including early treatment of exposed groups, clearly does not affect the maintenance of the pathogen of interest. The aim here is to prevent consequences of zoonotic infections. Testing is a relevant option, when possible, and be risk-based. An important aspect is informing medics to ensure precocious and sometimes preventive treatment					yes
Captive animals unit
Compartiment to consider when susceptible domestic animals can be victims of the infection of interest, or play a role of liaison host toward human
Zoning and establishment of a containment zone	Zoning aims at defining subpopulations of distinct health status within a territory for the purpose of disease control and/or international trade. Zoning applies to an animal subpopulation defined primarily on a geographical basis (using natural, artificial or legal boundaries). In practice, spatial considerations and good management including biosecurity plans play important roles in the applica…					no
	Establishment of a containment zone: A particular application of the concept of zoning is the establishment of a containment zone. In the event of limited outbreaks of a specified disease within an otherwise free country or zone, a single containment zone, which includes all cases, can be established for the purpose of minimizing the impact on the entire country or zone.
Compartmentalisation	Compartmentalisation aims at defining subpopulations of distinct health status within a territory for the purpose of disease control and/or international trade. Compartmentalisation applies to an animal subpopulation defined primarily by management and husbandry practices related to biosecurity. In practice, spatial considerations and good management including biosecurity plans play important rol…					no
Biosecurity and biocontainment in general: Segregation, housing, fencing	Answer yes if one or more measures below can be implemented					yes
Segregation/Isolation	Reduce contacts with the source by creating a “bubble” around domestic animals. Efficiency of isolation strongly depends on the size and intrusive behaviour of the wild animal releasing the pathogen
Scaring away wildlife	All devices that scare or repel wild animals can be tested, but these devices can also deter domestic animals from using those surfaces dedicated to them. Wild animals may learn quickly to avoid these devices, or get used to them and not be scared away from them
Reduction of attractivity	Reduce contacts by reducing attractivity of land used by domestic animals for source, generally wildlife: no salt stone, perches, feeders, drinkers
Offal and carcass retriveval	Food-borne diseases: hunters and game wardens should ensure appropriate disposal of by-products after hunting (offal and remains) in order to restrict access to domestic or wild animals. Also pigs, poultry or cats may not be fed with these by-products.
Vaccination	When the wild reservoir is large (in size and number), not clinically affected by the pathogen but sheds the pathogen, and desirable (patrimonial interest), development and deployment of a vaccination scheme may be a long term option to allow sustainable breeding of livestock in proximity to wildlife.					no
	The delineation of cattle vaccination area has to be conservative and precautious since the exact delimitation of the range used by infected wild animals may be imprecisely known (considering that would be easier to achieve for directly transmitted infections)
	Questions to consider:
	1. Does a vaccine exist for livestock regarding the disease of interest?
	2. Does this vaccine confer full protection from infection or does it limit the progression of infection or its excretion by vaccinated host?
	3. Is it safe?
	4. Is this vaccine effective enough at individual scale to protect against infection (mass vaccination is there not an aim)?
	5. Fast and efficient administration (e.g. for ring vaccination in emergency situation)
	6. Is there a DIVA (Differentiating Infected from Vaccinated Animals) strategy available?
	7. How long will the domestic population be protected/how often will the vaccination have to be repeated under continuous exposure to wildlife?
Culling	Most efficient for directly transmitted diseases : Culling measures should be followed by a period where no new animals are brought on the premises, the length of this period depending on pathogen survivability in the environment					no
	Culling of domestic animals can only be deemed useful if the identified population is considered a secondary source of infection for humans, other domestic populations or wildlife and that the health status of this population cannot be restored by other means (isolation, treatment, and vaccination).
	When such measure would not be scheduled for the wildlife compartment, communication to farmers and acceptance by them may be an issue. Anyhow, culling exposed herds or flocks may be a way to establish a buffer zone in between the reservoir and a surrounding large stock of cattle. Financial compensation must be considered.
	Test and cull procedures may be an intermediate option.
Laissez-faire	Laissez-faire (Doing nothing) in the domestic animal compartment has been recognized as a valuable option by the group and is always the baseline scenario, in any intervention evaluation process, to compare interventions to in terms of costs and efficiency. Indeed, the costs of action may be, in certain conditions, higher than the impacts of pathogen circulation.					no
	Laissez-faire may be applicable only for some options among the range of possibilities it has described. It means “refrain from harming”, in the same context of the adage “primum non nocere” that the medical professions share to guide a prudent and proportionate response to cure a disease.
	Active monitoring and surveillance, communication to exposed public and early reactions are actually far from doing nothing. This means that this course of action also bears non negligible financial and human costs and has to be implemented over the long term.
Environment unit
For indirectly transmitted diseases, especially by ingestion, modification of the environment could be considered as an applicable option. The smaller the area to manage, the greater the chances of efficacy and the smaller the chances to limit detrimental ecological effects. In general modifying components of the natural environment leads to a cascade of events which are particularly difficult to…
Environment modification to limit attraction of wildlife	Environment may be managed to attract wild animals far from contact zones (deer or boars inside forests). Separation of wild and domestic animals may be useful. Long fences when appropriately designed may orient movements of wild animals or isolate livestock from infectious contacts. They may also deter wild animals from essential resources and have long term impact on the turnover of their natur…					no
Manage terrestrial lands to affect pathogen or vector survival	Managing terrestrial lands (plowing, burning…) to can be used to limit the survival of pathogens within the soils					no
Manage wetlands to affect pathogen or vector survival	Water-borne diseases: Brightening up the banks of rivers or ponds by cutting vegetation, oxygenation, change of Ph, salinity etc... may be appropriate to limit or stop the survival of pathogens, spores, larvae or eggs in water.
Remove natural and infective sources of water or food	Food-borne or transmitted by accidental ingestion diseases: Options, such as drying the land, emptying ponds (restricting access to natural sources of water), burning vegetation and remove natural sources of food can be seen as options.
Limit the development of certain species acting as hosts	Multi-stage parasitical diseases: Measures that lead to reduce the presence or the number of intermediate hosts may be efficient. Chemical destruction of intermediate hosts in water, grass or ground, could be done after an assessment of the environmental risk.
Laissez-faire	Laissez-faire (Doing nothing) in the environmental compartment has been recognized as a valuable option by the group and is always the baseline scenario, in any intervention evaluation process, to compare interventions to in terms of costs and efficiency.					yes
	Laissez-faire may be applicable only for some options among the range of possibilities it has described. It means “refrain from harming”, in the same context of the adage “primum non nocere” that the medical professions share to guide a prudent and proportionate response to cure a disease.
	Action on the environment may yield multiple and unforeseable consequences that may be greater than the positive impact on a single pathogen.
Wildlife unit
Indicators of success should concern not only the source of the pathogen (wild population), but also the target populations (humans, livestock, other domestic animals) in order to assess the overall efficiency of the campaigns
Biosecurity*	Biosecurity measures aiming at reducing infectious contacts among wildlife are of particular importance in the case of directly transmitted diseases.					yes
	Answer yes if one or more measures below can be implemented
Limit aggregation and contacts	Stopping feeding points for wildlife and banning game management encouraging wildlife to gather.
Offal and carcass retriveval	Ensure that offal and carcass disposal do not expose wildlife to infection (reinforce retrieval of offal and appropriate burning or burying of virulent relieves or remains).
Limit dispersal	Dispersal of infectious individuals can be increased by driven hunt. Therefore, banning sport hunting in infected areas can help limiting the expansion of an outbreak. Other activities in the natural environment may have a dispersing effect and shall be banned as well.
Vaccination	This measure can be selective or not. Vaccination of wildlife is a long term and expensive measure which should be considered as experimental. Vaccine production is then another issue. For herbivorous species, delivery systems are at very early stage of experimentation. Injection of vaccine may be an option when animals targeted can be trapped in number. Remote delivery of vaccine bait in the nat…					no
	The prerequisites considered previously for immunisation of domestic animals have to be addressed for wildlife
Treatment	Treatment of wildlife is an option by the use of antibiotics or wormicid (anthelmintic) and poses questions regarding resistance due to difficulty to strictly follow a medical prescription and spread of residues. Yet wildlife treatment was limited to captive populations or limited scale trials. Treatment can only be seen as an option when the disease endangers the conservation of a species with a…					no
Culling	Culling, for purposes of controlling a disease, is effective to protect victim species, only when the maintenance population is a wild species. When domestic animals maintain the pathogen, culling of a wild species is counterproductive as it does not affect pathogen circulation. The maintenance host, and specifically the exact epidemiological role of the wild hosts, must be carefully examined in …					no	The potential for a perturbation effect should be evaluated. Whilst this is an area of active research, risk factors associated with the potential for a perturbation effect should be consulted. This should be considered in relation to (logistically realistic) culling efficacy in space and time and can be built in to the performance targets of a culling operation.
	For both total culling and test and cull methods, three epidemiological and biological aspects have an impact on the efficiency:						Monitoring: Culling of free living wildlife, whichever the type of killing, can only be seen as an option in wild populations that are well monitored. In order to achieve and monitor a culling operation, precise knowledge on the pre-cull population size and structure is needed, which in itself can prove to be a major challenge. Monitoring is essential because the efficiency of the method has to b…
	1. Efficiency of such procedures will be lower in bigger and more open populations (numerical objectives harder to achieve, more contact with other populations).
	2. Efficiency of such procedure will be higher for pathogens with long incubation periods and lower excretion levels.						There are welfare, ecological and ethical issues in culling wild animals (also legal issues for protected species). The reluctance of wide parts of human society must be taken into account in assessing the desirability of these operations and this must be weighed against the benefits of such operations, as well as other social and political concerns.
	3. And efficiency depends on the prevalence of the disease. The more prevalent, the more efficient.
Total culling	Depopulation : Preferably for a population of limited size and geographically distributed, the aim is eradication of the pathogen by eradication of the host population. Total culling is therefore not an option in multi-host maintenance systems. Total culling operation can only be seen as a “one shot” operation; to avoid those new receptive individuals relaunched the infection process: the numeric…
Test and Cull	Test and cull requires the existence of appropriate testing methods (simple & rapid, useable in the field, sensitive and eventually specific). Test and cull procedures are expensive because animals need to be captured, handled, tested and then released or euthanized (in remote areas, where scavengers may use the carcasses, proper disposal of carcasses is an issue). Such measures therefore require…
	There is also a risk inherent to this method: such procedure leave entirely susceptible animals on the field (only the positive animals are culled). Such procedures have to be carefully prepared in order to eradicate or cull a sufficient number of positive animals to break the transmission. If an insufficient proportion of positive animals is culled, a new outbreak becomes possible.
Laissez-faire	In the management of wildlife diseases, the demand for action is strong. Pressure on the decision makers by civil stakeholders experiencing a negative economic impact of the disease may be important (farmers, farming value chain actors, etc.). Laissez-faire has been nevertheless unanimously recognized as a valuable option by the group and is always the baseline scenario, in any intervention evalu…					no
	Laissez-faire may be applicable only for some options among the range of possibilities it has described. It means “refrain from harming”, in the same context of the adage “primum non nocere” that the medical professions share to guide a prudent and proportionate response to cure a disease.
	Active monitoring and surveillance, communication to exposed public and early reactions are actually far from doing nothing. This means that this course of action also bears non negligible financial and human costs and has to be implemented over the long term.
* The forthcoming “animal health law” will expand the use of these concepts in animal productions.
i.Zoning
Zoning is a large scale measure that aims at identifying areas of circulation of a pathogen, by preventing and prohibiting the entry of susceptible livestock herds in these areas, avoiding infectious contact so as to define geographic areas free of the disease.
ii Compartmentalisation
Subpopulations of livestock contained in one or more establishments are raised under a common biosecurity management system requiring containment, surveillance and control and for the purpose of a safe trade.
iii Biosecurity in general: Isolation, housing, fencing
The efficiency of such methods also strongly depends on the size and intrusive behaviour of the wild animal releasing the pathogen. As an illustration, a wide-mesh netting can be effective for deer but not for small rodents or birds.
Confinement: There is a welfare issue in housing live animals (previously bred in open range) for long period of time.

## Sheet: Vector-borne transmission
Check-list of relevant options for control of a disease with vector-borne transmission (and eventual indirect and/or direct transmission)
3 aspects have to be considered before conclusion on each measure:
- Feasibility (do tools/methods exist and are available for the implementation of measures?)
- Cost (What is the cost : financial cost, human effort, logistics in general, other costs)
- Efficiency (is this measure alone effective or not sufficient)
Terms in bold and italic characters are explained at the end of the tab
Measures to consider in order of priority for evaluation	Description of the measures	Management goal for each unit: Prevention, Control, Eradication, Laissez-faire	Feasibility	Cost	Efficiency	To be considered according to answers to the 3 precedent cells (YES/NO)	Comments/arguments on the possible measure	Other comments
Human unit
Unit to consider when zoonotic disease, all measures concerning this compartment limit exposure/effects of the disease on humans but have no impact on pathogen circulation
Education	Answer yes if one or more measures below can be implemented					no
Information, communication	Information of professionals, doctors in particular, communication to the general public and professions at risk, education at different levels
Protective measures for exposed professionnals	Implementation of protective measures (protective garment, masks, and gloves) for exposed professionals (including game wardens, scientists, students and wildlife veterinarians)
Modification of behavior/self-protection against vectors	Use of repellents and protective clothes for self-protection or other protective measures such as insect control in the home. More generally vector borne diseases are highly seasonal and geographically heterogeneously distributed. Modelling and seasonal/geographical risk mapping are primary elements in order to define specific areas/seasons of exposure. The more focused the information is, the mo…
Modification of behavior	Modification of behavior including hygiene.
Food hygiene and inspection	Implement game carcass or meat inspection (as imposed by hygiene package) and prefer long cooking, deep freezing for preparation or storage of venison (such hygiene measures have to be proven efficient in pathogen reduction beforehand).
Vaccination	Vaccination programmes should be risk-based and concern exposed groups. When outbreaks are localised, in addition to locals, tourists (including hunters) may need to be immunised					yes
Treatment	Implementation of protective measures, including early treatment of exposed groups, clearly does not affect the maintenance of the pathogen of interest. The aim here is to prevent consequences of zoonotic infections. Testing is a relevant option, when possible, and be risk-based. An important aspect is informing medics to ensure precocious and sometimes preventive treatment					no
Captive animals unit
Compartiment to consider when susceptible domestic animals can be victims of the infection of interest, or play a role of liaison host toward human
Zoning and establishment of a containment zone	Zoning aims at defining subpopulations of distinct health status within a territory for the purpose of disease control and/or international trade. Zoning applies to an animal subpopulation defined primarily on a geographical basis (using natural, artificial or legal boundaries). In practice, spatial considerations and good management including biosecurity plans play important roles in the applica…					yes	Flying vectors: Zoning must then take into account the flying span of the vectors, which can get quickly inappropriate for management purpose.
	Establishment of a containment zone: A particular application of the concept of zoning is the establishment of a containment zone. In the event of limited outbreaks of a specified disease within an otherwise free country or zone, a single containment zone, which includes all cases, can be established for the purpose of minimizing the impact on the entire country or zone.
Compartmentalisation	Compartmentalisation aims at defining subpopulations of distinct health status within a territory for the purpose of disease control and/or international trade. Compartmentalisation applies to an animal subpopulation defined primarily by management and husbandry practices related to biosecurity. In practice, spatial considerations and good management including biosecurity plans play important rol…					no
Biosecurity and biocontainment in general: Segregation, housing, fencing	Answer yes if one or more measures below can be implemented					no
Temporal segregation	Vectors have specific activity patterns according to the season and also to the time of the day. According to the vector activity pattern, outdoor activities for domestic pets (dogs/cats), foraging or pasturing could be restricted to specific periods.
Segregation of sick animals	One confinement method could be a strict isolation of infected animals during the period of pathogen circulation in blood in order to avoid infecting vectors (especially for terrestrial vectors).
Preventive treatment (insecticides)	Domestic animals can be chemically protected by the use of repellents. The extent of use of these can span from short, periodic, risk-based treatments to regular “dipping” or spraying of the animals in insecticides. The use of such methods must however be proportionate and adapted after proper assessment and management of the environmental impact of these measures.
Vector-proof buildings	Flying vectors: Full protection from airborne vectors can only be achieved in vector proof buildings (housing) which exists mostly for experimental facilities.
Excluding shelter possibilities	Terrestrial vectors: Isolation can be pertinent for diseases transmitted by terrestrial vectors (ticks) by excluding shelter possibilities: Domestic animals should be deterred from shrubs and arboreal vegetation in pastures, fences should separate livestock from hedges.
Segregation/Isolation	Reduce contacts with the source by creating a “bubble” around domestic animals. Efficiency of isolation strongly depends on the size and intrusive behaviour of the wild animal releasing the pathogen
Scaring away wildlife	All devices that scare or repel wild animals can be tested, but these devices can also deter domestic animals from using those surfaces dedicated to them. Wild animals may learn quickly to avoid these devices, or get used to them and not be scared away from them
Reduction of attractivity	Reduce contacts by reducing attractivity of land used by domestic animals for source, generally wildlife: no salt stone, perches, feeders, drinkers
Offal and carcass retriveval	Food-borne diseases: hunters and game wardens should ensure appropriate disposal of by-products after hunting (offal and remains) in order to restrict access to domestic or wild animals. Also pigs, poultry or cats may not be fed with these by-products.
Vaccination	In the case of vector-borne diseases, vaccination may be the unique option to protect domestic animals from infection. When the wild reservoir is large (in size and number), not clinically affected by the pathogen but sheds the pathogen, and desirable (patrimonial interest), development and deployment of a vaccination scheme may be a long term option to allow sustainable breeding of livestock in …					no
	The delineation of cattle vaccination area has to be conservative and precautious since the exact delimitation of the range used by infected wild animals may be imprecisely known (considering that would be easier to achieve for directly transmitted infections)
	Questions to consider:
	1. Does a vaccine exist for livestock regarding the disease of interest?
	2. Does this vaccine confer full protection from infection or does it limit the progression of infection or its excretion by vaccinated host?
	3. Is it safe?
	4. Is this vaccine effective enough at individual scale to protect against infection (mass vaccination is there not an aim)?
	5. Fast and efficient administration (e.g. for ring vaccination in emergency situation)
	6. Is there a DIVA (Differentiating Infected from Vaccinated Animals) strategy available?
	7. How long will the domestic population be protected/how often will the vaccination have to be repeated under continuous exposure to wildlife?
Culling	Most efficient for directly transmitted diseases : Culling measures should be followed by a period where no new animals are brought on the premises, the length of this period depending on pathogen survivability in the environment					no
	Culling of domestic animals can only be deemed useful if the identified population is considered a secondary source of infection for humans, other domestic populations or wildlife and that the health status of this population cannot be restored by other means (isolation, treatment, and vaccination).
	When such measure would not be scheduled for the wildlife compartment, communication to farmers and acceptance by them may be an issue. Anyhow, culling exposed herds or flocks may be a way to establish a buffer zone in between the reservoir and a surrounding large stock of cattle. Financial compensation must be considered.
	Vector-borne diseases displaying long-term persistence in the blood-stream (and therefore availability for the vector) seem to call for test and cull methods.
Laissez-faire	Laissez-faire (Doing nothing) in the domestic animal compartment has been recognized as a valuable option by the group and is always the baseline scenario, in any intervention evaluation process, to compare interventions to in terms of costs and efficiency. Indeed, the costs of action may be, in certain conditions, higher than the impacts of pathogen circulation.					no
	Laissez-faire may be applicable only for some options among the range of possibilities it has described. It means “refrain from harming”, in the same context of the adage “primum non nocere” that the medical professions share to guide a prudent and proportionate response to cure a disease.
	Active monitoring and surveillance, communication to exposed public and early reactions are actually far from doing nothing. This means that this course of action also bears non negligible financial and human costs and has to be implemented over the long term.
Environment unit
For vector-borne diseases, modification of the environment could be considered as an applicable option. The smaller the area to manage, the greater the chances of efficacy and the smaller the chances to limit detrimental ecological effects. In general modifying components of the natural environment leads to a cascade of events which are particularly difficult to predict and evaluate in advance, t…
Environment modification : limit vectors	Mosquitoes can thrive in certain man-made constructions or facilities, such as tire depots for instance. Identifying and suppressing these man-made conditions can be of importance					yes
	Measures that lead to reduce the presence or the number of intermediate hosts may be efficient. Chemical destruction of intermediate hosts in water, grass or ground, could be done after an assessment of the environmental risk.
Environment modification to limit attraction of wildlife	Environment may be managed to attract wild animals far from contact zones (deer or boars inside forests). Separation of wild and domestic animals may be useful. Long fences when appropriately designed may orient movements of wild animals or isolate livestock from infectious contacts. They may also deter wild animals from essential resources and have long term impact on the turnover of their natur…					no
Manage terrestrial lands to affect pathogen or vector survival	Managing terrestrial lands (plowing, burning…) to can be used to limit the survival of pathogens within the soils					no
Manage wetlands to affect pathogen or vector survival	Water-borne diseases: Brightening up the banks of rivers or ponds by cutting vegetation, oxygenation, change of Ph, salinity etc... may be appropriate to limit or stop the survival of pathogens, spores, larvae or eggs in water.
Remove natural and infective sources of water or food	Food-borne or transmitted by accidental ingestion diseases: Options, such as drying the land, emptying ponds (restricting access to natural sources of water), burning vegetation and remove natural sources of food can be seen as options.
Limit the development of certain species acting as hosts	Multi-stage parasitical diseases: Measures that lead to reduce the presence or the number of intermediate hosts may be efficient. Chemical destruction of intermediate hosts in water, grass or ground, could be done after an assessment of the environmental risk.
Laissez-faire	Laissez-faire (Doing nothing) in the environmental compartment has been recognized as a valuable option by the group and is always the baseline scenario, in any intervention evaluation process, to compare interventions to in terms of costs and efficiency.					no
	Laissez-faire may be applicable only for some options among the range of possibilities it has described. It means “refrain from harming”, in the same context of the adage “primum non nocere” that the medical professions share to guide a prudent and proportionate response to cure a disease.
	Action on the environment may yield multiple and unforeseable consequences that may be greater than the positive impact on a single pathogen.
Wildlife unit
Indicators of success should concern not only the source of the pathogen (wild population), but also the target populations (humans, livestock, other domestic animals) in order to assess the overall efficiency of the campaigns
Biosecurity*	Biosecurity measures aiming at reducing infectious contacts among wildlife are of particular importance in the case of directly transmitted diseases.					yes
	Answer yes if one or more measures below can be implemented
Limit aggregation and contacts	Stopping feeding points for wildlife and banning game management encouraging wildlife to gather.
Offal and carcass retriveval	Ensure that offal and carcass disposal do not expose wildlife to infection (reinforce retrieval of offal and appropriate burning or burying of virulent relieves or remains).
Limit dispersal	Dispersal of infectious individuals can be increased by driven hunt. Therefore, banning sport hunting in infected areas can help limiting the expansion of an outbreak. Other activities in the natural environment may have a dispersing effect and shall be banned as well.
Vaccination	This measure can be selective or not. Vaccination of wildlife is a long term and expensive measure which should be considered as experimental. Vaccine production is then another issue. For herbivorous species, delivery systems are at very early stage of experimentation. Injection of vaccine may be an option when animals targeted can be trapped in number. Remote delivery of vaccine bait in the nat…					no
	The prerequisites considered previously for immunisation of domestic animals have to be addressed for wildlife:
Treatment	Treatment of wildlife is an option by the use of antibiotics or wormicid (anthelmintic) and poses questions regarding resistance due to difficulty to strictly follow a medical prescription and spread of residues. Yet wildlife treatment was limited to captive populations or limited scale trials. Treatment can only be seen as an option when the disease endangers the conservation of a species with a…					no
Culling	Culling, for purposes of controlling a disease, is effective to protect victim species, only when the maintenance population is a wild species. When domestic animals maintain the pathogen, culling of a wild species is counterproductive as it does not affect pathogen circulation. The maintenance host, and specifically the exact epidemiological role of the wild hosts, must be carefully examined in …					no	The potential for a perturbation effect should be evaluated. Whilst this is an area of active research, risk factors associated with the potential for a perturbation effect should be consulted. This should be considered in relation to (logistically realistic) culling efficacy in space and time and can be built in to the performance targets of a culling operation.
	For both total culling and test and cull methods, three epidemiological and biological aspects have an impact on the efficiency:						Monitoring: Culling of free living wildlife, whichever the type of killing, can only be seen as an option in wild populations that are well monitored. In order to achieve and monitor a culling operation, precise knowledge on the pre-cull population size and structure is needed, which in itself can prove to be a major challenge. Monitoring is essential because the efficiency of the method has to b…
	1. Efficiency of such procedures will be lower in bigger and more open populations (numerical objectives harder to achieve, more contact with other populations).
	2. Efficiency of such procedure will be higher for pathogens with long incubation periods and lower excretion levels.						There are welfare, ecological and ethical issues in culling wild animals (also legal issues for protected species). The reluctance of wide parts of human society must be taken into account in assessing the desirability of these operations and this must be weighed against the benefits of such operations, as well as other social and political concerns.
	3. And efficiency depends on the prevalence of the disease. The more prevalent, the more efficient.
Total culling	Depopulation : Preferably for a population of limited size and geographically distributed, the aim is eradication of the pathogen by eradication of the host population. Total culling is therefore not an option in multi-host maintenance systems. Total culling operation can only be seen as a “one shot” operation; to avoid those new receptive individuals relaunched the infection process: the numeric…
Test and Cull	Test and cull requires the existence of appropriate testing methods (simple & rapid, useable in the field, sensitive and eventually specific). Test and cull procedures are expensive because animals need to be captured, handled, tested and then released or euthanized (in remote areas, where scavengers may use the carcasses, proper disposal of carcasses is an issue). Such measures therefore require…
	There is also a risk inherent to this method: such procedure leave entirely susceptible animals on the field (only the positive animals are culled). Such procedures have to be carefully prepared in order to eradicate or cull a sufficient number of positive animals to break the transmission. If an insufficient proportion of positive animals is culled, a new outbreak becomes possible.
Laissez-faire	In the management of wildlife diseases, the demand for action is strong. Pressure on the decision makers by civil stakeholders experiencing a negative economic impact of the disease may be important (farmers, farming value chain actors, etc.). Laissez-faire has been nevertheless unanimously recognized as a valuable option by the group and is always the baseline scenario, in any intervention evalu…					no
	Laissez-faire may be applicable only for some options among the range of possibilities it has described. It means “refrain from harming”, in the same context of the adage “primum non nocere” that the medical professions share to guide a prudent and proportionate response to cure a disease.
	Active monitoring and surveillance, communication to exposed public and early reactions are actually far from doing nothing. This means that this course of action also bears non negligible financial and human costs and has to be implemented over the long term.
* The forthcoming “animal health law” will expand the use of these concepts in animal productions.
i.Zoning
Zoning is a large scale measure that aims at identifying areas of circulation of a pathogen, by preventing and prohibiting the entry of susceptible livestock herds in these areas, avoiding infectious contact so as to define geographic areas free of the disease.
ii Compartmentalisation
Subpopulations of livestock contained in one or more establishments are raised under a common biosecurity management system requiring containment, surveillance and control and for the purpose of a safe trade.
iii Biosecurity in general: Isolation, housing, fencing
The efficiency of such methods also strongly depends on the size and intrusive behaviour of the wild animal releasing the pathogen. As an illustration, a wide-mesh netting can be effective for deer but not for small rodents or birds.
Confinement: There is a welfare issue in housing live animals (previously bred in open range) for long period of time.

## Sheet: Synthesis
Synthesis of measures to implement in reaction to
(example)
	Transmission route	Yes/no
	Direct transmission	yes
	Indirect transmission	no
	Vector-borne transmission	no
	Measures …	… to implement
	Education of human	yes
	Vaccination of human	no
	Treatment of human	no
	Zoning of captive animals	no
	Compartmentalisation of captive animals	no
	General biosecurity in captive compartment	yes
	Vaccination of captive animals	no
	Culling of captive animals	no
	Do nothing on captive animals	no
	Biosecurity in wildlife compartment	yes
	Vaccination of wildlife	yes
	Treatment of wildlife	no
	Culling of wildlife	no
	Do nothing on wildlife compartment	no
	Environment modification to limit attraction of wildlife	no
	Environment modification : drying wetlands
	Environment modification : limit vectors
	Do nothing on environnement	no
